# Supplementary material for: Prokaryotic and eukaryotic microbiomes associated with blooms of the ichthyotoxic dinoflagellate Cochlodinium (Margalefidinium) polykrikoides in New York, USA, estuaries
Source: PubMed Central journal article supplement (PMC6837389; doi:10.1371/journal.pone.0223067), 2019-11-07
Supplement: pone.0223067.s002.pdf [file pone.0223067.s002.pdf]

S2 Table.

| <b>Date</b>               | <b>Location</b>   | <b>size fraction</b> | <b>split libraries output</b> | <b>UCLUST output</b> | <b># of reads assigned as chloroplasts</b> | <b># of reads assigned as mitochondria</b> |
|---------------------------|-------------------|----------------------|-------------------------------|----------------------|--------------------------------------------|--------------------------------------------|
| <b><u>Time series</u></b> |                   |                      |                               |                      |                                            |                                            |
|                           | <i>Unassigned</i> |                      | 652966                        | 642519               | 153816                                     | 714                                        |
| 8/26/2011                 | Patch             | 0.2                  | 172119                        | 170410               | 15328                                      | 81                                         |
| 8/26/2011                 | Patch             | 5                    | 43094                         | 42178                | 19708                                      | 23                                         |
| 8/26/2011                 | Non-Patch         | 0.2                  | 191064                        | 189490               | 18437                                      | 78                                         |
| 8/26/2011                 | Non-Patch         | 5                    | 85387                         | 84464                | 40464                                      | 54                                         |
| 8/30/2011                 | Patch             | 0.2                  | 57336                         | 56409                | 12718                                      | 38                                         |
| 8/30/2011                 | Patch             | 5                    | 36709                         | 36134                | 28867                                      | 8                                          |
| 8/30/2011                 | Non-Patch         | 0.2                  | 168121                        | 165774               | 37141                                      | 72                                         |
| 8/30/2011                 | Non-Patch         | 5                    | 141834                        | 140577               | 107068                                     | 47                                         |
| 8/28/2012                 | Patch             | 0.2                  | 56088                         | 55372                | 5083                                       | 31                                         |
| 8/28/2012                 | Patch             | 5                    | 91937                         | 91126                | 19899                                      | 112                                        |
| 8/28/2012                 | Non-Patch         | 0.2                  | 237883                        | 234397               | 29497                                      | 96                                         |
| 8/28/2012                 | Non Patch         | 5                    | 156541                        | 154454               | 59786                                      | 83                                         |
| 9/6/2012                  | Patch             | 0.2                  | 162222                        | 160867               | 24216                                      | 1187                                       |
| 9/6/2012                  | Patch             | 5                    | 31761                         | 31388                | 16585                                      | 508                                        |
| 9/6/2012                  | Non-Patch         | 0.2                  | 259628                        | 257585               | 24648                                      | 495                                        |
| 9/6/2012                  | Non-Patch         | 5                    | 194326                        | 191928               | 121061                                     | 393                                        |
| 8/30/2013                 | Patch             | 0.2                  | 173522                        | 172566               | 4071                                       | 81                                         |
| 8/30/2013                 | Patch             | 5                    | 57210                         | 56307                | 6706                                       | 35                                         |
| 8/30/2013                 | Non-Patch         | 0.2                  | 89494                         | 89014                | 2129                                       | 31                                         |
| 8/30/2013                 | Non-Patch         | 5                    | 130789                        | 128501               | 18193                                      | 57                                         |
| 10/2/2013                 | Patch             | 0.2                  | 91458                         | 90373                | 6970                                       | 108                                        |
| 10/2/2013                 | Patch             | 5                    | 39568                         | 38355                | 21485                                      | 39                                         |
| 10/2/2013                 | Non-Patch         | 0.2                  | 217055                        | 214851               | 11936                                      | 131                                        |
| 10/2/2013                 | Non-Patch         | 5                    | 123300                        | 122305               | 64358                                      | 68                                         |
|                           |                   | Total                | 3661412                       | 3617344              | 870170                                     | 4570                                       |
