# Supplementary material for: Prokaryotic and eukaryotic microbiomes associated with blooms of the ichthyotoxic dinoflagellate Cochlodinium (Margalefidinium) polykrikoides in New York, USA, estuaries
Source: PubMed Central journal article supplement (PMC6837389; doi:10.1371/journal.pone.0223067), 2019-11-07

S18 Fig.

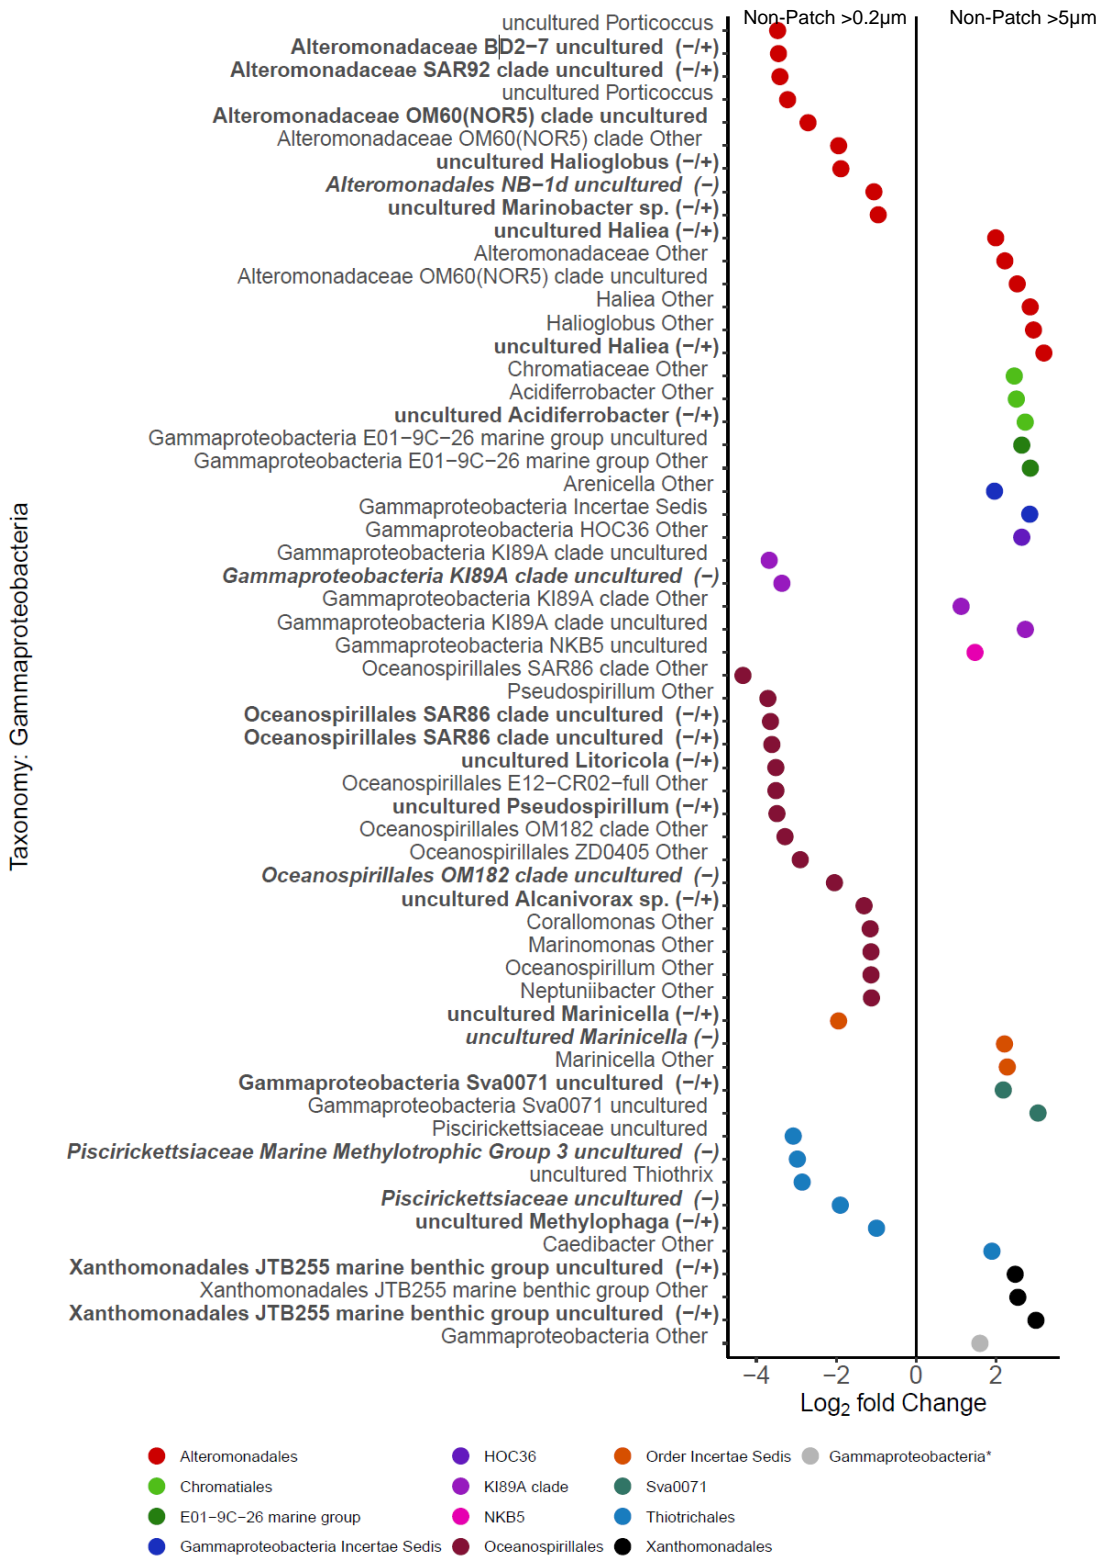

Supplement: pone.0223067.s022.pdf [file pone.0223067.s022.pdf]
